# Supplementary material for: Assessing healthcare access among residents in rural Eastern San Diego County: a qualitative study
Source: Research Square preprint supplement (doi:10.21203/rs.3.rs-7293882/v1), 2025-08-25
Supplement: Supplementary file 1 [file 8481894d9d8a40a4431c329b.docx]

**Additional file 1: Interview questions**

A copy of our original interview guide. The interview guide was available in English or Spanish for our participants. We amended certain questions as data collection advanced.

1. Currently, how do folks in your community seek out healthcare?

Probes:

a. What types of health issues do folks in your community typically seek services?

b. What are some challenges in receiving health care? (i.e., Limited clinic hours, cost, etc.)

2. Are there specific health issues impacting your community that you are aware of?

Probes:

a. Do these health issues affect any specific groups in your community (i.e., elderly, women, etc.)?

b. How do people in your community deal with these health issues?

c. What do you think can be done to address these health issues?

3. What have been your experiences in attempting to use healthcare services in your community?

Probes:

a. Describe a time when you needed medical care but didn’t receive it?

b. What barriers currently prevent you from accessing resources in your community?

4. What kind of resources are not currently available in your community that would improve your quality of life or health?

Probes:

a. What types of healthcare or public health resources would you like to see in your community?

i. Resources such as preventative or annual testing?

b. What are things around where you live help you to be healthy? What are the things around where you live that make it harder to be healthy?

i. Think of things such as access to healthy foods, safe places to be physically active, distance to healthcare centers, reliable childcare, etc.

5. What struggles do people in your community face in affording basic things like housing, food, and transportation?

Probe:

a. Are there resources that people in your community regularly use to cover these basic needs?

b. What health service is urgently needed in your community? (1 type of service preferred). Please describe ONE answer.

**Question Bank:**

- Describe the community’s relationships with the healthcare system (i.e., clinics, medical teams, pharmacies).
  - Probe

1. Describe your level of comfort when interacting with a healthcare provider and why.
2. In your opinion, what factors contribute to a strong patient-provider relationship and why?

- What are your experiences with accessing healthcare?
  - Probe:

1. Please share a positive experience with a health provider or clinic.
2. Please share a negative experience with a health provider or clinic

- What are the community’s attitudes when it comes to seeking healthcare services?
  - Probe:

1. What motivates you to seek healthcare services?
2. What makes an individual capable of seeking healthcare services, and why?

- How does/ would the community feel about receiving healthcare services from a mobile health clinic?
  - Probe

1. Describe your experience accessing mobile healthcare services in terms of location and time availability.
2. How do the services of a mobile healthcare unit compare to those offered at the doctor’s office?
